# Supplementary material
Source: PubMed Central journal article supplement (PMC3704008)
Supplement: 1305392110_pnas.201305392SI.pdf [file 1305392110_pnas.201305392SI.pdf]

# Supporting Information

Sherwood and Bibb 10.1073/pnas.1305392110

## SI Experimental Procedures

**Heterologous Expression of the Planosporicin Biosynthetic Gene Cluster in *Streptomyces coelicolor* After Deletion of *pspW*.** pIJ12328 containing *orf-11* to *pspV* (1) was PCR-targeted to replace *pspW* with the P1-flippase (FLP) recognition target (FRT)-hygromycin<sup>R</sup>-*oriT*-FRT-P2 cassette amplified from pIJ10700 using the primer pairs listed in Table S1. The disruption cassette was subsequently eliminated by FLP-recombinase-mediated site-specific recombination (2). This was achieved by streaking single colonies of *Escherichia coli* DH5 $\alpha$ /BT340 containing the targeted cosmid on LB agar and growing at 42 °C overnight. Clones sensitive to hygromycin (originally used to select for the cassette used for mutagenesis) but carbenicillin and kanamycin resistant (conferred by the cosmid backbone) were identified and removal of the cassette confirmed by PCR using flanking primers; the PCR products were Sanger-sequenced to confirm the presence of the 81-bp scar. The scarred cosmid was targeted once more to introduce the *oriT-attP-int-aac(3)IV* fragment from pIJ10702 into the SuperCos backbone as described previously (1, 2). Successful targeting was confirmed by NotI restriction digest, and the cosmid was introduced into *E. coli* ET12567/pUZ8002 by transformation and then conjugated into *S. coelicolor*; exconjugants were selected with 50  $\mu$ g/mL apramycin and confirmed by colony PCR.

**Detection of Planosporicin Production in *S. coelicolor*.** Spores from M1146 and M1152 derivatives containing the *psp* gene cluster integrated at the  $\Phi$ C31 *attB* site were grown as a lawn on R5 agar. To assay for the presence of antimicrobial compounds, 2  $\times$  2 cm squares of agar were placed on a lawn of *Micrococcus luteus*. Alternatively, agar plugs were excised using a cork borer and embedded in LB agar containing *M. luteus*. Plates were photographed after incubating overnight at 30 °C. To identify the antimicrobial compounds, a  $\sim$ 4  $\times$   $\sim$ 1 cm section of agar was extracted with 3–5 mL of 5% formic acid and  $\sim$ 0.8  $\mu$ L of the extract spotted onto a MALDI-TOF plate and analyzed as described previously (1).

**Construction of *pspR* and *pspX* Expression Plasmids and Transfer to *S. coelicolor*.** *pspR* and *pspX* were PCR-amplified to yield 5' NdeI and 3' PacI sites, cloned into pGEM-T (Promega) and confirmed by PCR and sequencing. Error-free clones were digested with NdeI and PacI and ligated into similarly digested pIJ10257 to create pIJ12715 (*P<sub>ermE\*</sub>-pspX*) and pIJ12716 (*P<sub>ermE\*</sub>-pspR*), (Table S1). These plasmids were integrated independently at the  $\Phi$ BT1 site of the M1152 derivative containing the *psp* gene cluster integrated at the  $\Phi$ C31 *attB* site. Exconjugants were selected with 40  $\mu$ g/mL hygromycin and confirmed by colony PCR.

**Construction of a Minimal *psp* Gene Set Lacking *pspEF*.** The *pspR-pspV* gene set was created by replacement of flanking DNA as described previously (1). A 39bp-XbaI-P1-FRT-apramycin<sup>R</sup>-*oriT*-FRT-P2-XbaI-39bp-extended resistance cassette was used to replace the region from *PCS-19* to *pspF* in pIJ12327 [containing *PCS-19* to *pspV* (1)], digested with XbaI to excise the cassette, religated, and then targeted once again to replace *neo* on the SuperCosI backbone with the *oriT-attP-int-aac(3)IV* cassette to yield pIJ12720 (Table S1). At each stage, the cosmid derivative

was confirmed by PCR with primers flanking the deleted region (Table S2), as well as by diagnostic restriction digests.

***gusA* Transcriptional Fusions.** The four *psp* promoters were amplified to yield 5' XbaI and 3' SpeI sites and ligated into pGUS digested with the same two enzymes to place *gusA* under the control of each promoter, thus creating pIJ12724 (*P<sub>pspA</sub>-gusA*), pIJ12726 (*P<sub>pspX</sub>-gusA*), pIJ12727 (*P<sub>pspR</sub>-gusA*), and pIJ12728 (*P<sub>pspE</sub>-gusA*). The plasmids were integrated into the  $\Phi$ BT1 *attB* site of *S. coelicolor* M1152 after conjugation via the donor strain *E. coli* ET12567/pUZ8002. Exconjugants were selected using apramycin and confirmed by PCR. These strains were used as negative controls in GUS assays and as conjugation recipients for constructs in which *pspX*, *pspR*, or *pspXW* was expressed from *P<sub>ermE\*</sub>*. The latter constructs were made by PCR-amplifying each gene to yield 5' NdeI and 3' PacI sites followed by cloning in pIJ10257 digested with the same two enzymes (Table S2). Exconjugants were selected using hygromycin and confirmed by PCR.

**GUS Assays.** For agar plate-based assays, *S. coelicolor* strains were streaked from spore stocks onto 25-mL plates of R2 agar containing 100  $\mu$ L of 40 mg/mL 5-bromo-4-chloro-3-indolyl- $\beta$ -D-glucuronide and photographed after 3 d at 30 °C. For spectrophotometric GUS assays, *S. coelicolor* strains were grown in biological triplicates in TSB (30 g/L Oxoid Tryptone Soya Broth powder dissolved in distilled water and autoclaved) liquid medium. The positive control strain expressed *gusA* from the constitutive *P<sub>ermE\*</sub>*. Negative control strains contained *gusA* under the control of each of the *psp* promoters (integrated at the  $\Phi$ C31 *attB* site) in the absence of a transcriptional activator gene; 10-mL aliquots of TSB were inoculated with  $\sim$ 10<sup>8</sup> spores of each strain and incubated in a universal containing a steel spring for 1–2 d at 30 °C and 250 rpm. Strains were subcultured into 10 mL TSB to equivalent densities (measured at OD<sub>450</sub>) in triplicate. After 24 h, 100  $\mu$ L was used to measure cell density at 450 nm, whereas mycelium harvested from 1 mL was washed in distilled water, resuspended in 1 mL of lysis buffer (50 mM phosphate buffer at pH 7, 0.1% triton X-100, 0.27%  $\beta$ -mercaptoethanol, and 4 mg/mL lysozyme) and incubated for 30 min at 37 °C. Cell debris was removed by centrifugation; 100  $\mu$ L of cell lysate was assayed in triplicate in a 96-well assay plate, using phosphate buffer (8 g/L Na<sub>2</sub>HPO<sub>4</sub> 7H<sub>2</sub>O, 2.35 g/L NaH<sub>2</sub>PO<sub>4</sub> H<sub>2</sub>O, adjusted to pH 7) as a blank; 100  $\mu$ L of Z-buffer (16.1 g/L Na<sub>2</sub>HPO<sub>4</sub> 7H<sub>2</sub>O, 5.5 g/L NaH<sub>2</sub>PO<sub>4</sub> H<sub>2</sub>O, 0.75 g/L KCl, 0.246 g/L MgSO<sub>4</sub> 7H<sub>2</sub>O, adjusted to pH 7 and supplemented with 2.7 mL/L  $\beta$ -mercaptoethanol immediately before use) containing 20  $\mu$ L of 4 mg/mL *p*-nitrophenyl- $\beta$ -D-glucuronide was added to each well. OD<sub>420</sub> was measured every minute for 1 h at 30 °C on a Powerwave 340 plate reader. If the kinetic reaction proceeded too quickly for accurate measurement of product accumulation, the assay was repeated using 25  $\mu$ L or 10  $\mu$ L of lysate. The remaining cell lysate was used to calculate the amount of protein released from the mycelium using Bradford reagent (BioRad). Miller units were calculated as 1,000  $\times$  (OD<sub>420</sub> of sample – OD<sub>420</sub> of blank) / (time of reaction in minutes  $\times$  volume of culture assayed in milliliters  $\times$  OD<sub>450</sub> of culture) and expressed per milligram of protein.

1. Sherwood EJ, Hesketh AR, Bibb MJ (2013) Cloning and analysis of the planosporicin antibiotic biosynthetic gene cluster of *Planomonospora alba*. *J Bacteriol* 195(10):2309–2321, 10.1128/JB.02291-12.  
2. Gust B, Challis GL, Fowler K, Kieser T, Chater KF (2003) PCR-targeted *Streptomyces* gene replacement identifies a protein domain needed for biosynthesis of the sesquiterpene soil odor geosmin. *Proc Natl Acad Sci USA* 100(4):1541–1546.

3. Gust B, et al. (2004) Lambda red-mediated genetic manipulation of antibiotic-producing *Streptomyces*. *Adv Appl Microbiol* 54:107–128.  
4. Paget MS, Chamberlin L, Atrih A, Foster SJ, Buttner MJ (1999) Evidence that the extracytoplasmic function sigma factor sigmaE is required for normal cell wall structure in *Streptomyces coelicolor* A3(2). *J Bacteriol* 181(1):204–211.

5. Yanai K, Murakami T, Bibb M (2006) Amplification of the entire kanamycin biosynthetic gene cluster during empirical strain improvement of *Streptomyces kanamyceticus*. *Proc Natl Acad Sci USA* 103(25):9661–9666.
6. Bierman M, et al. (1992) Plasmid cloning vectors for the conjugal transfer of DNA from *Escherichia coli* to *Streptomyces* spp. *Gene* 116(1):43–49.

7. Hong HJ, Hutchings MI, Hill LM, Buttner MJ (2005) The role of the novel Fem protein VanK in vancomycin resistance in *Streptomyces coelicolor*. *J Biol Chem* 280(13):13055–13061.
8. Myronovskiy M, Welle E, Fedorenko V, Luzhetskyy A (2011) Beta-glucuronidase as a sensitive and versatile reporter in actinomycetes. *Appl Environ Microbiol* 77(15): 5370–5383.

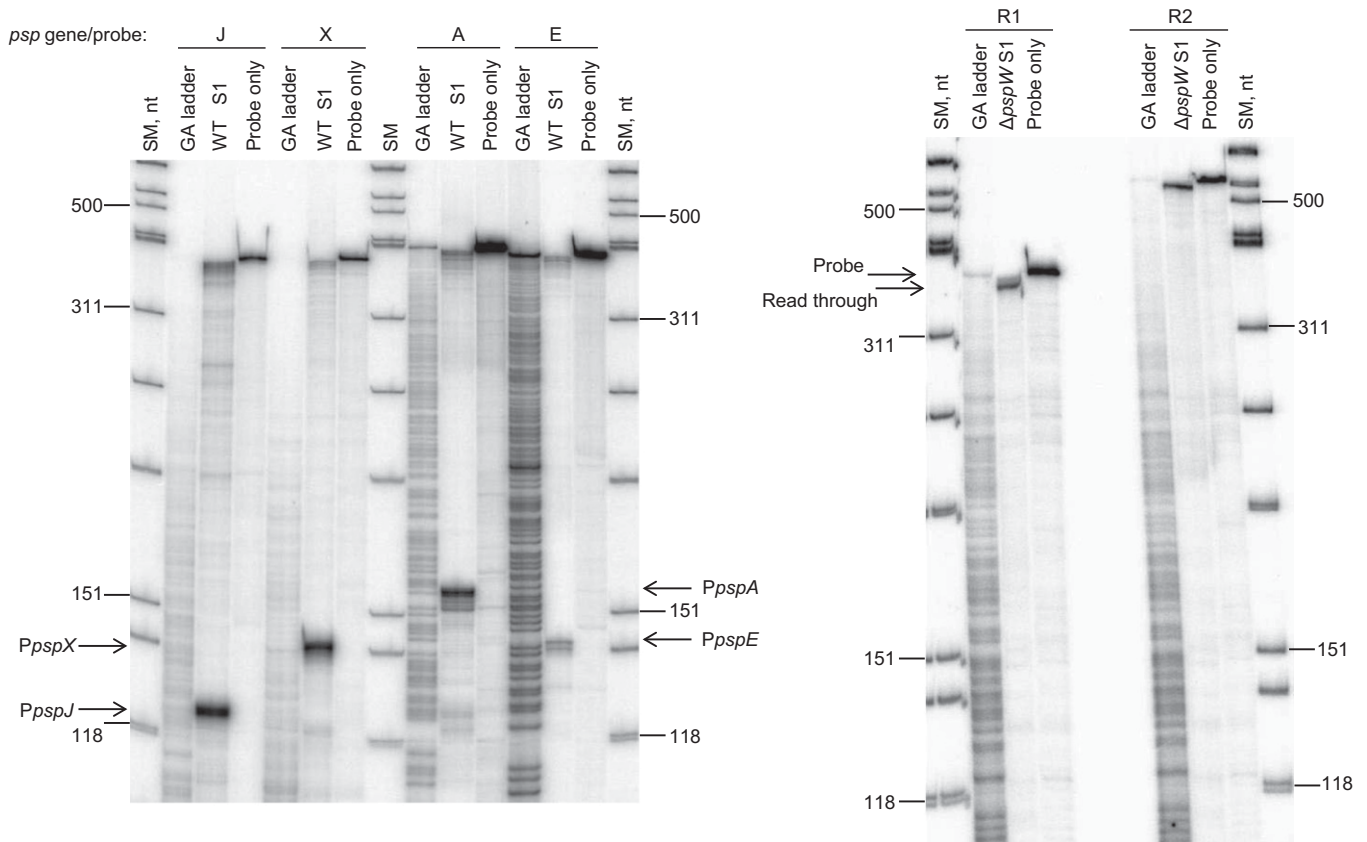

**Fig. S1.** High-resolution S1 nuclease mapping of the 5' ends of transcripts reading into *pspJ*, *pspX*, *pspA*, *pspE*, and *pspR* using PCR-generated probes and RNA from *Planomonospora alba* wild type (WT) or the *pspW* mutant. Protected fragments were subjected to polyacrylamide gel electrophoresis adjacent to GA-sequencing ladders derived from the corresponding 5' end-labeled probe to determine precise transcriptional start sites. Size markers (SM) were a heat-denatured  $\gamma$ -<sup>32</sup>P-labeled *Hinf*I digest of  $\phi$ X174 DNA.

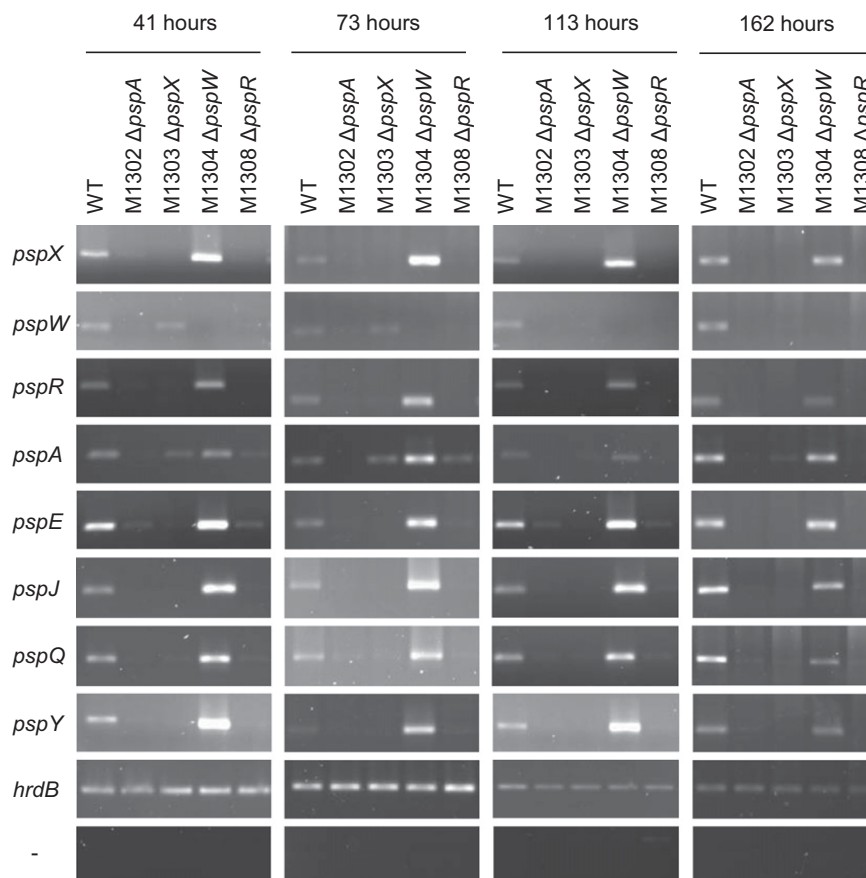

**Fig. S2.** RT-PCR analysis of *P. alba* strains WT, M1302 ( $\Delta$ *pspA*), M1303 ( $\Delta$ *pspX*), M1304 ( $\Delta$ *pspW*), and M1308 ( $\Delta$ *pspR*). RNA extracted from each strain at four different time points was used as a template for cDNA synthesis. Primers annealing within *pspX*, *pspW*, *pspR*, *pspA*, *pspE*, *pspJ*, *pspQ*, *pspY*, and *hrdB* (positive control) were used to assess the level of transcription of these genes at each time point. Attempts to synthesize *hrdB* cDNA without pretreatment with RT served as negative controls (marked as -). PCR products were subjected to electrophoresis on a 2% agarose gel.

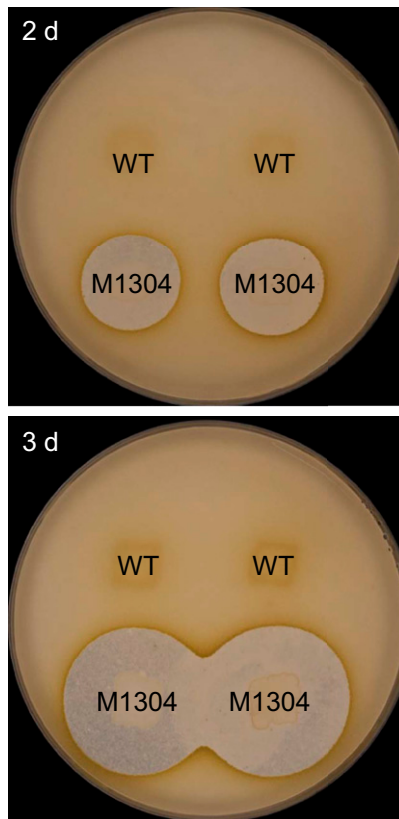

**Fig. S3.** Planosporicin production by *P. alba* WT and M1304 ( $\Delta pspW$ ). Approximately  $10^6$  *P. alba* spores of each strain were patched on AF/MS agar plates and incubated at 30 °C. After 2 or 3 d, plates were overlaid with *M. luteus* to reveal halos of growth inhibition.

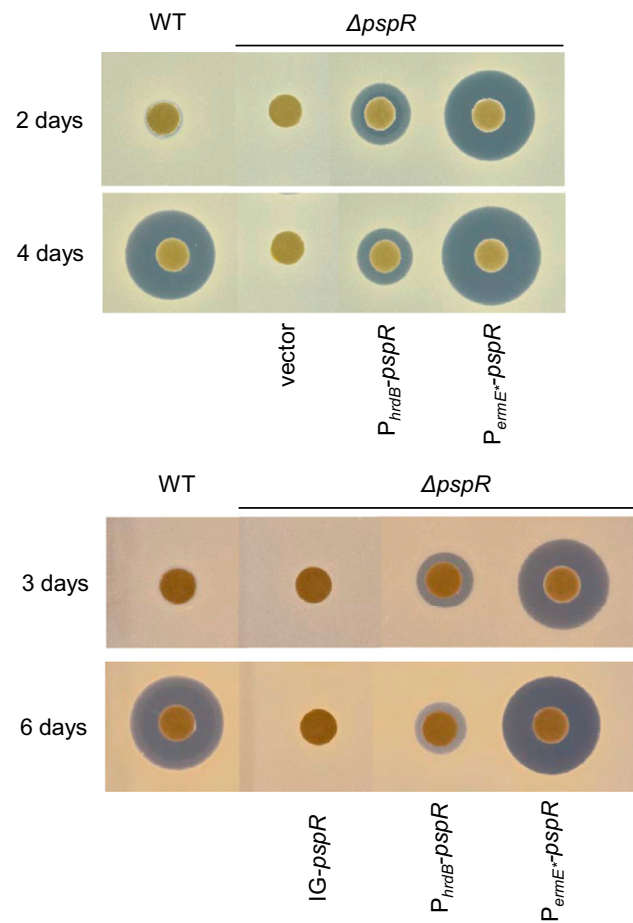

**Fig. S4.** Time course of complementation of *P. alba*  $\Delta$ *pspR* mutant (M1308) with *pspR* expressed from the *hrdB* or *ermE\** promoters. In two independent experiments (*Upper* and *Lower*), the four strains were cultured in parallel in AF/MS liquid medium, and culture supernatants were assayed for activity against *Micrococcus luteus* after 2 and 4 d (*Upper*) or 3 and 6 d (*Lower*). IG-*pspR*, vector containing *pspR* preceded by the *pspQ-pspR* intergenic region that lacks promoter activity; Vector, empty vector with no *pspR* present (Fig. S1).

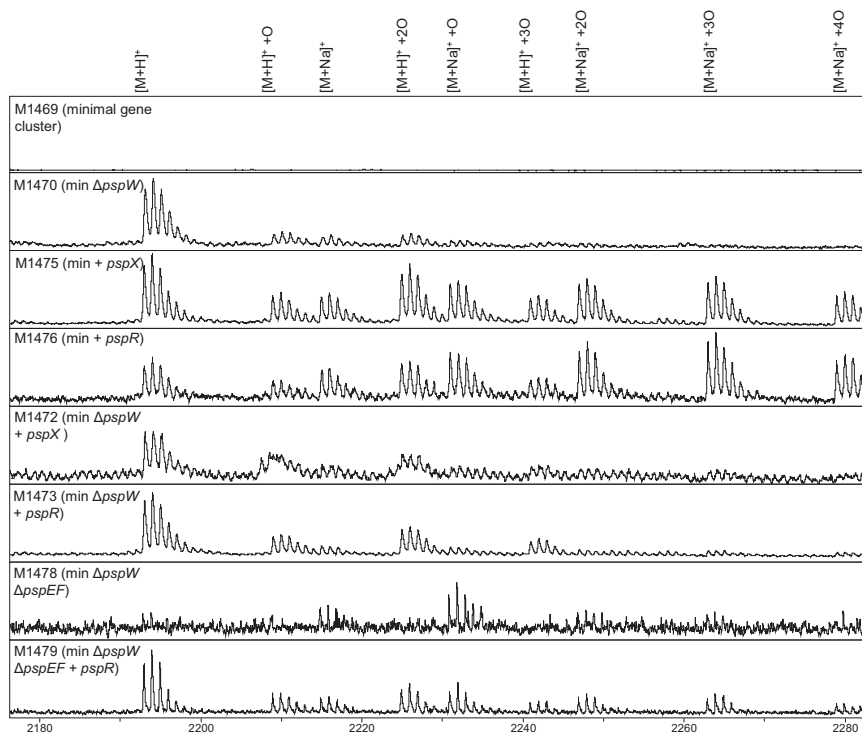

**Fig. S5.** MALDI-TOF mass spectrometry of culture supernatants of *S. coelicolor* M1152 derivatives with the *psp* WT and  $\Delta$ *pspW* gene clusters integrated at the  $\phi$ iC31 *attB* site and overexpressing either *pspX* or *pspR* integrated at the  $\phi$ iBT1 *attB* site. *S. coelicolor* strains M1469 [M1152 containing the minimal *psp* gene cluster (min)], M1470 (M1152 with min  $\Delta$ *pspW*), M1475 (M1152 with min plus  $P_{ermE^+}$ -*pspX*), M1476 (M1152 with min plus  $P_{ermE^+}$ -*pspR*), M1472 (M1152 with min  $\Delta$ *pspW* plus  $P_{ermE^+}$ -*pspX*), M1473 (M1152 with min  $\Delta$ *pspW* plus  $P_{ermE^+}$ -*pspR*), M1478 (M1152 with min  $\Delta$ *pspW*  $\Delta$ *pspEF*), and M1479 (M1152 with min  $\Delta$ *pspW*  $\Delta$ *pspEF* plus  $P_{ermE^+}$ -*pspR*) were grown as confluent lawns on R5 agar for 6 d. Agar samples were extracted with 5% formic acid and analyzed by MALDI-TOF mass spectrometry. Intensity is given on the y axis in arbitrary units (au) and the mass/charge ratio (*m/z*) on the x axis. The identities of each monoisotopic *m/z* peak for planosporicin and its adducts are indicated. [M+H]<sup>+</sup>: 2,192 Da; [M+H]<sup>+</sup> + O: 2,208 Da; [M+Na]<sup>+</sup>: 2,214 Da; [M+H]<sup>+</sup> + 2O: 2,224 Da; [M+Na]<sup>+</sup> + O: 2,230 Da; [M+H]<sup>+</sup> + 3O: 2,240 Da; [M+Na]<sup>+</sup> + 2O: 2,246 Da; [M+Na]<sup>+</sup> + 3O: 2,262 Da; and [M+Na]<sup>+</sup> + 4O: 2,278 Da.



**Table S1. Oligonucleotides used in this study**

| Primer name                                                                     | Sequence, 5'–3'                              | Application/target                                   |
|---------------------------------------------------------------------------------|----------------------------------------------|------------------------------------------------------|
| <b>Overexpression and complementation in <i>P. alba</i></b>                     |                                              |                                                      |
| PspXF_BamHI                                                                     | ATGGATCCGCTCGTCTGGGCAGTGTCC                  | <i>pspX</i> with upstream region                     |
| PspXR_XbaI                                                                      | ATTCTAGAACGAGACGCTGGTGTGG                    |                                                      |
| pspRF_Xba                                                                       | ATATTCTAGAGAAGGTCGGCACGTA                    | <i>pspR</i> with upstream region                     |
| PspRR_BamHI                                                                     | ATATGGATCCCTCAGCAGGACCATGAAGC                |                                                      |
| pspR_F                                                                          | CAGGACCATGAAGCTCTGC                          | Fuse $P_{hrdB}$ to <i>pspR</i> flanked by XbaI sites |
| XbaIpspR_R                                                                      | ATTCTAGATCCGATGCCGGTGTCC                     |                                                      |
| XbaIPhrdB_F                                                                     | ATTCTAGAGAACCCCATATGTTGTTGG                  |                                                      |
| PhrdB-pspR_R                                                                    | ACCGGCAGAGCTTCATGGTCTGAAAGCGT<br>GACGAGAATGG |                                                      |
| <b>Deletion of <i>pspW</i> from minimal gene set</b>                            |                                              |                                                      |
| –2 disruptF                                                                     | TCGGCGTACGGACCCCGCCCGCCGGGGCTCGC             | $\Delta$ <i>pspW</i>                                 |
|                                                                                 | GTCAATTCGGGGATCCGTCGACC                      |                                                      |
| –2 disruptR                                                                     | CGCTGCGCGTTGGAAGGATCGGGACGACGATGAC           |                                                      |
|                                                                                 | GGAATGTAGGCTGGAGCTGCTTC                      |                                                      |
| –2 confirmF                                                                     | GTCATGTCTGGCCTTCC                            | $\Delta$ <i>pspW</i> confirmation                    |
| –2 confirmR                                                                     | GTCGAGGAACTCGCTACC                           |                                                      |
| <b>Deletion of <i>pspEF</i> from minimal gene set</b>                           |                                              |                                                      |
| updisruptF                                                                      | TCTACCTGCCCGCTTCGAACGCGTCGTCACGCAGG          | $\Delta$ <i>orf-19-pspF</i> with XbaI sites          |
|                                                                                 | CCTCTAGAATTCGGGGATCCGTCGACC                  |                                                      |
| updisruptR4                                                                     | AGGCCCTCCGGCCCGCTACGCCCTCCTCGGGGTACG         |                                                      |
|                                                                                 | TCTAGATGTAGGCTGGAGCTGCTTC                    |                                                      |
| upconfirm                                                                       | GCGGCGGCCGTGGTGTTCAC                         | confirm $\Delta$ <i>orf-19-pspF</i>                  |
| PspF confirmR                                                                   | GTGCTCAATCTGCCATACC                          |                                                      |
| <b>Cloning <i>psp</i> genes downstream of <math>P_{ermE}</math> in pIJ10257</b> |                                              |                                                      |
| NdeI_pspXF                                                                      | ATCATATGTTCCGCTCATCCGAGGCT                   | <i>pspX</i>                                          |
| pspXR_PacI                                                                      | ATTTAATTAAGTCTGTTGGGAGTGTCC                  |                                                      |
| NdeI_pspRF                                                                      | ATCATATGCGCCGGCACGCTTCGCAGGC                 | <i>pspR</i>                                          |
| pspRR_PacI                                                                      | ATTTAATTAAGTACCCCCGCAGAG                     |                                                      |
| NdeI_pspXW_F                                                                    | ATCATATGTTCCGCTCATCCGAGG                     | <i>pspXW</i>                                         |
| HindIII_pspXW_R                                                                 | ATAAGCTATCCGGGCGAGAAATCC                     |                                                      |
| NdeI_pspEFF                                                                     | ATCATATGAACACCACGGCCGCCGACC                  | <i>pspEF</i>                                         |
| pspEFR_HindIII                                                                  | ATAAGCTTACGTCATGACCATCTCC                    |                                                      |
| <b>RT-PCR primers</b>                                                           |                                              |                                                      |
| pspE_RTF                                                                        | GTGACGCTCGAGTTCTGG                           | <i>pspE</i>                                          |
| pspE_RTR                                                                        | ACCTTGGCGACGAAGTAGC                          |                                                      |
| pspR_RTF2                                                                       | CCGTTCCGGAGCAGTAGTAGC                        | <i>pspR</i>                                          |
| pspR_RTR2                                                                       | GGAGTACGACAGGGAGCTGA                         |                                                      |
| pspQ_RTF                                                                        | CGGAACCTCCGGCTACACC                          | <i>pspQ</i>                                          |
| pspQ_RTF                                                                        | GGCCGAGACTCACCTTGC                           |                                                      |
| pspZ_RTF                                                                        | GGGAGTTCTCGACTACATCG                         | <i>pspZ</i>                                          |
| pspZ_RTR                                                                        | GACGGATCTCCATCAGC                            |                                                      |
| pspY_RTF2                                                                       | AGGTACGAGGCCCTGATGG                          | <i>pspY</i>                                          |
| pspY_RTR                                                                        | GGTGCAGAAGGTGTTGACG                          |                                                      |
| pspJ_RTF                                                                        | CTGGAGCTGCACCTGTCCG                          | <i>pspJ</i>                                          |
| pspJ_RTF                                                                        | GCCATCTCCAGGAACACG                           |                                                      |
| pspW_RTF                                                                        | ACTGCCGACGAGACTGG                            | <i>pspW</i>                                          |
| pspW_RTR                                                                        | CCAGCAACAGGTCGAAGG                           |                                                      |
| ECF_RTF                                                                         | GTCGAGGAACTCGCTACC                           | <i>pspX</i>                                          |
| ECF_RTR                                                                         | GTCCCGATCCTCCAACC                            |                                                      |
| pspA_RTF                                                                        | CCTGCCGACGAAACACC                            | <i>pspA</i>                                          |
| pspA_RTR                                                                        | CGCCGCTTCACTGG                               |                                                      |
| hrdB_RTF                                                                        | CCAAGGGCTACAAGTTCTCG                         | <i>hrdB</i>                                          |
| hrdB_RTR                                                                        | GGCCAGCTTGTGATGACC                           |                                                      |
| <b><i>psp</i> promoter primers</b>                                              |                                              |                                                      |
| XbaI_PspEF                                                                      | ATTCTAGA TTCCTTCTGACTGGAGTGG                 | $P_{pspE}$                                           |
| SpeI_PspER                                                                      | ATACTAGT CTGGCCGATCGTGGTC                    |                                                      |
| XbaI_PspJF                                                                      | ATTCTAGA GCACGGGAGGATTTCTCG                  | $P_{pspJ}$                                           |
| SpeI_PspJR                                                                      | ATACTAGT TCCCTCGTGGAGGAACC                   |                                                      |
| XbaI_PspXF                                                                      | ATTCTAGA GTGGCAGGACGATGACC                   | $P_{pspX}$                                           |
| SpeI_PspXR2                                                                     | ATACTAGT GCCATGTACGTATCCGGAA                 |                                                      |

**Table S1. Cont.**

| Primer name        | Sequence, 5'–3'                            | Application/target       |
|--------------------|--------------------------------------------|--------------------------|
| XbaI_PspAF         | ATTCTAGA ATCGGTTACGGTTACAG                 | P <sub>pspA</sub>        |
| SpeI_PspAR         | ATACTAGT AGGTGTTGCGGATTGC                  |                          |
| S1 mapping primers |                                            |                          |
| S1pspR2F           | *AGGACGTTGAGTTCGACAGC                      | 560 bp P <sub>pspR</sub> |
| S1pspR2R           | <u>CATCTGCATCTGCATAAAGGACCGACGAATGACC</u>  |                          |
| S1pspR1F2          | *AGGACGTTGAGTTCGACAGC                      | 367 bp P <sub>pspR</sub> |
| S1pspR1R           | <u>CATCTGCATCTGCATCGGAACTTCGGCTACACC</u>   |                          |
| S1pspJF            | *GCGGACCTCGTGTCTCC                         | 367 bp P <sub>pspJ</sub> |
| S1pspJR            | <u>CATCTGCATCTGCATAGCCCTGCTGGGATGG</u>     |                          |
| S1pspXF            | *GATCTCCTCGGCCACACC                        | 375 bp P <sub>pspX</sub> |
| S1pspXR            | <u>CATCTGCATCTGCATCGTAAATCACGCAATCATGG</u> |                          |
| S1pspEF            | <u>CATCTGCATCTGCATTTCTTCTGACTGGAGTGG</u>   | 386 bp P <sub>pspE</sub> |
| S1pspER2           | *AGGAACCCGCTCTGC                           |                          |
| S1pspAF2           | <u>CATCTGCATCTGCATCACACGCCATGTACGTATCC</u> | 396 bp P <sub>pspA</sub> |
| S1pspAR2           | *ACGAGACGCTGGTGATGG                        |                          |

Underlined sequence indicates a nonhomologous tail to distinguish between full-length protection and probe:probe reannealing. ECF, extracytoplasmic function; F, forward; R, reverse.

\*Label on the 5' end of oligonucleotides annealing within the protein coding sequence.

**Table S2. Plasmids used in this study**

| Plasmid                                                      | Description                                                                                         | Selectable markers | Source         |
|--------------------------------------------------------------|-----------------------------------------------------------------------------------------------------|--------------------|----------------|
| General plasmids                                             |                                                                                                     |                    |                |
| pIJ790                                                       | $\lambda$ -RED ( <i>gam</i> , <i>bet</i> , <i>exo</i> ), <i>cat</i> , <i>araC</i> , <i>rep101ts</i> | Chl                | Ref. 3         |
| pUZ8002                                                      | <i>tra</i> , <i>neo</i> , RP4                                                                       | Kan                | Ref. 4         |
| pIJ10702                                                     | <i>attP int</i> ( $\Phi$ C31) <i>oriT</i> pUCori (also known as pMJCos1)                            | Carb Apra          | Ref. 5         |
| pIJ773                                                       | pBS SK+ containing cassette<br>P1-FRT- <i>oriT</i> - <i>aac</i> (3)/V-FRT-P2                        | Carb Apra          | Ref. 3         |
| pIJ10700                                                     | pBS SK+ containing cassette<br>P1-FRT- <i>oriT</i> - <i>hyg</i> -FRT-P2                             | Hyg                | Ref. 3         |
| pGEM-T                                                       | TA-cloning vector                                                                                   | Carb               | Promega        |
| pSET152                                                      | <i>attP int</i> ( $\Phi$ C31) <i>oriT</i> pUCori                                                    | Apra               | Ref. 6         |
| Complementation and <i>P. alba</i> overexpression constructs |                                                                                                     |                    |                |
| pIJ12539                                                     | pSET152 containing <i>pspX</i> and upstream intergenic region                                       | Apra               | Ref. 1         |
| pIJ12540                                                     | pSET152 containing <i>pspR</i> and upstream intergenic region                                       | Apra               | This work      |
| pIJ12709                                                     | pSET152 P <sub>hrdB</sub> - <i>pspR</i>                                                             | Apra               | This work      |
| Cosmids for heterologous expression                          |                                                                                                     |                    |                |
| pIJ12321                                                     | SuperCosI B4-1                                                                                      | Carb Kan           | Ref. 1         |
| pIJ12323                                                     | pIJ10702 B4-1                                                                                       | Carb Apra          | Ref. 1         |
| pIJ12327                                                     | pIJ12323 with genes downstream of <i>pspV</i> removed                                               | Carb Apra          | Ref. 1         |
| pIJ12328                                                     | pIJ12327 with genes upstream of <i>orf-12</i> removed                                               | Carb Apra          | Ref. 1         |
| pIJ12329                                                     | pIJ12327 with genes upstream of <i>pspE</i> removed                                                 | Carb Apra          | Ref. 1         |
| pIJ12719                                                     | pIJ12328 with $\Delta$ <i>pspW</i> ::( <i>scarred hyg-oriT</i> )                                    | Carb Apra          | This work      |
| pIJ12721                                                     | pIJ12327 with genes upstream of <i>pspR</i> removed and $\Delta$ <i>pspW</i> :: <i>scar</i>         | Carb Apra          | This work      |
| pIJ12722                                                     | pIJ12324 with $\Delta$ <i>pspW</i> :: <i>scar</i>                                                   | Carb Apra          | This work      |
| M1152 <i>psp</i> overexpression constructs                   |                                                                                                     |                    |                |
| pIJ10257                                                     | <i>attP int</i> ( $\Phi$ BT1) <i>oriT</i> pUCori P <sub>ermE</sub> *                                | Hyg                | Ref. 7         |
| pIJ12715                                                     | pIJ10257 <i>pspX</i>                                                                                | Hyg                | This work      |
| pIJ12716                                                     | pIJ10257 <i>pspR</i>                                                                                | Hyg                | This work      |
| pIJ12717                                                     | pIJ10257 <i>pspEF</i>                                                                               | Hyg                | Ref. 1         |
| pIJ12718                                                     | pIJ10257 <i>pspXW</i>                                                                               | Hyg                | This work      |
| <i>gusA</i> transcriptional fusions                          |                                                                                                     |                    |                |
| pGUS                                                         | <i>gusA</i> in pSET152                                                                              | Apra               | Ref. 8         |
| pIJ10740                                                     | P <sub>ermE</sub> *- <i>gusA</i>                                                                    | Apra               | Morgan Feeney* |
| pIJ12724                                                     | P <sub>pspA</sub> *- <i>gusA</i>                                                                    | Apra               | This work      |
| pIJ12726                                                     | P <sub>pspX</sub> *- <i>gusA</i>                                                                    | Apra               | This work      |
| pIJ12727                                                     | P <sub>pspJ</sub> *- <i>gusA</i>                                                                    | Apra               | This work      |
| pIJ12728                                                     | P <sub>pspE</sub> *- <i>gusA</i>                                                                    | Apra               | This work      |

\*John Innes Centre, Norwich, United Kingdom.
